# Supplementary material
Source: publisher site journal article supplement (https://www.dovepress.com/get_supplementary_file.php?f=273669.docx)
Supplement: Supplementary file 1 [file get_supplementary_file.php]

Table S1:- Socio demographic characteristics of nursing ad midwives working in North Wollo Zone governmental hospitals among nurses and midwives, 2019.

| Question | Variable | Frequency | Percent |
| --- | --- | --- | --- |
| Marital status | Married | 65 | 44.2 |
| Single | 76 | 51.7 |
| Divorced | 4 | 2.7 |
| Widowed | 2 | 1.4 |
| Religion | Orthodox | 122 | 83.0 |
| Muslim | 21 | 14.3 |
| Protestant | 4 | 2.7 |
| Level of education | Diploma | 48 | 32.7 |
| Degree and above | 99 | 67.3 |
| Professional category | Nurse | 112 | 76.2 |
| Midwifery | 35 | 23.8 |
| Current working area | Outpatient department | 17 | 11.6 |
| Emergency room | 20 | 13.6 |
| Injection and dressing | 5 | 3.4 |
| Delivery, ANC and PNC | 33 | 22.4 |
| Under 5 and pediatric ward | 23 | 15.6 |
| Operation room | 11 | 7.5 |
| Surgical ward | 15 | 10.2 |
| Medical ward | 20 | 13.6 |
| Others | 3 | 2.0 |
| Income | <5000 | 107 | 72.8 |
| >=5000 | 40 | 27.2 |
| Work experience | <5 | 97 | 66.0 |
| 5-10 | 41 | 27.9 |
| >10 | 9 | 6.1 |

Table S**2**:- Proportion of needle stick and sharp injury in hospitals at north Wollo zone governmental hospital, 2019.

| Hospitals | Yes | | NO | | Total | |
| --- | --- | --- | --- | --- | --- | --- |
| Frequency | Percent | Frequency | Percent | Frequency | Percent |
| Woldia | 57 | 38.7% | 19 | 12.9% | 76 | 51.7% |
| Lalibela | 19 | 12.9% | 10 | 6.8% | 29 | 19.7% |
| Kobo | 13 | 8.8% | 4 | 2.8% | 17 | 11.6% |
| Wadla | 10 | 6.9% | 3 | 2.0% | 13 | 8.8% |
| Meket | 12 | 8.2% | 0 | 0% | 12 | 8.2% |
| Total | 111 | 75.5% | 36 | 24.5% | 147 | 100% |
